# Supplementary material
Source: publisher site journal article supplement (https://www.dovepress.com/article/282246)
Supplement: Supplementary file 1 [file get_supplementary_file.php]

## Supplementary Materials

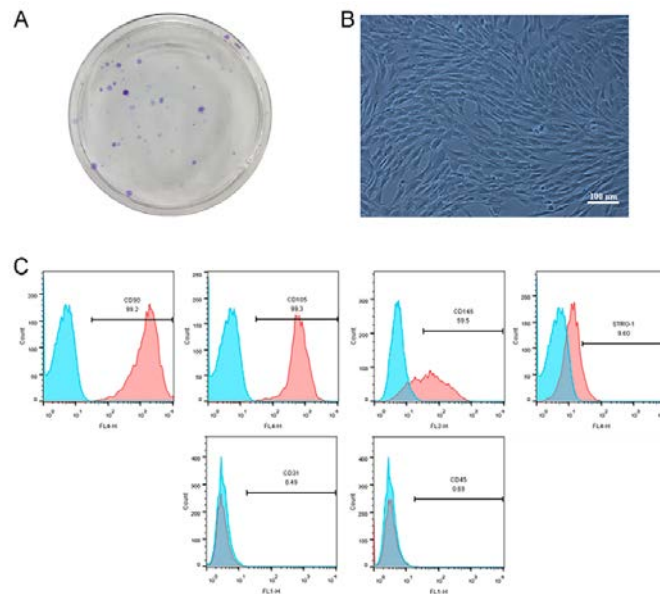

**Figure S1** Isolation and characterization of PDLSCs. (A) Single colonies formed after PDLSCs were plated at low density. (B) Light microscopic images of PDLSCs at passage three. (C) Flow cytometry analysis of PDLSCs (blue represents control cells, and red represents cells positive for markers).

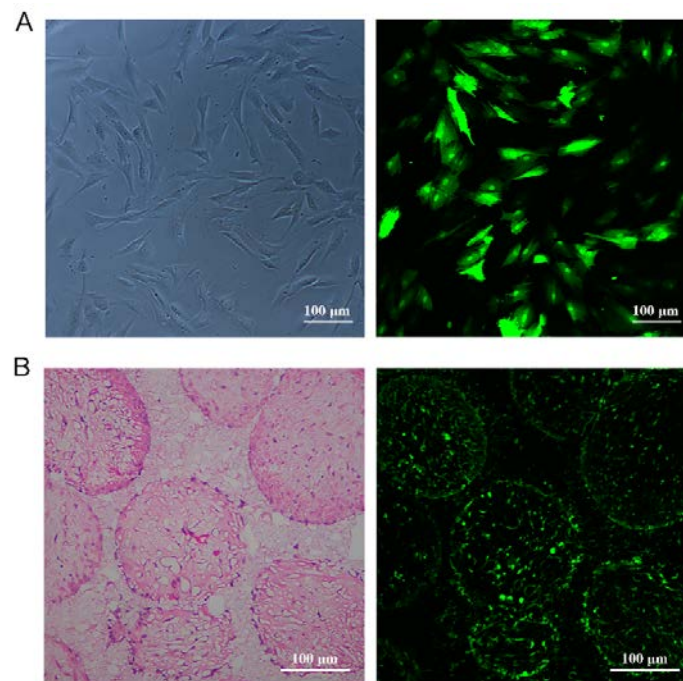

**Figure S2** Transfection of PDLSCs with GFP and tracking of implanted PDLSC sheets. (A) Light

microscopic and fluorescent images of PDLSCs after transfection. (B) Cell proliferation and growth inside the scaffold was assessed by laser confocal microscopy and HE staining.

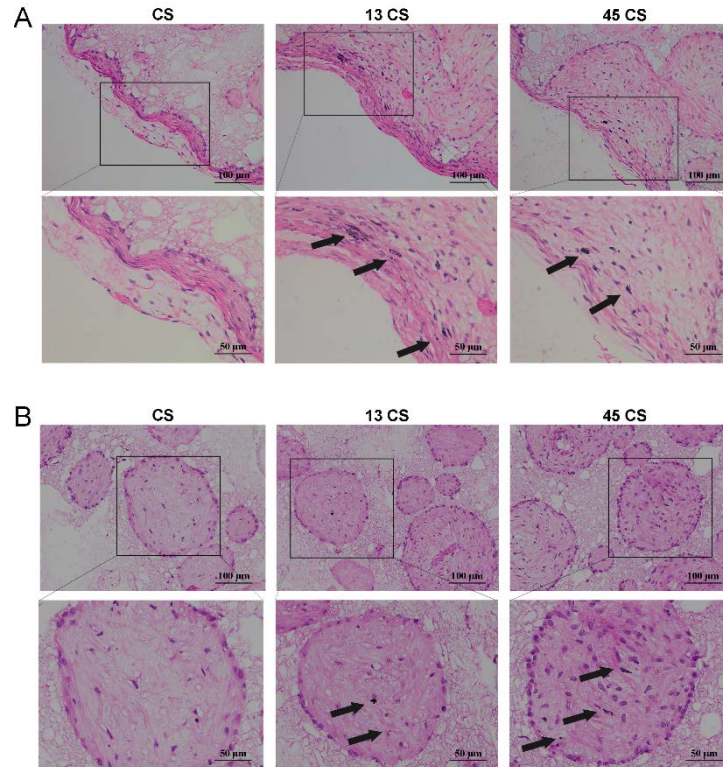

**Figure S3** AuNPs on the surface of the constructs (A) and inside the newly regenerated tissues (B). Arrows indicate internalized AuNPs.
